# Supplementary material for: Functional analysis of COP1 and SPA orthologs from Physcomitrella and rice during photomorphogenesis of transgenic Arabidopsis reveals distinct evolutionary conservation
Source: PubMed Central journal article supplement (PMC4091655; doi:10.1186/1471-2229-14-178), 2014-07-01

A

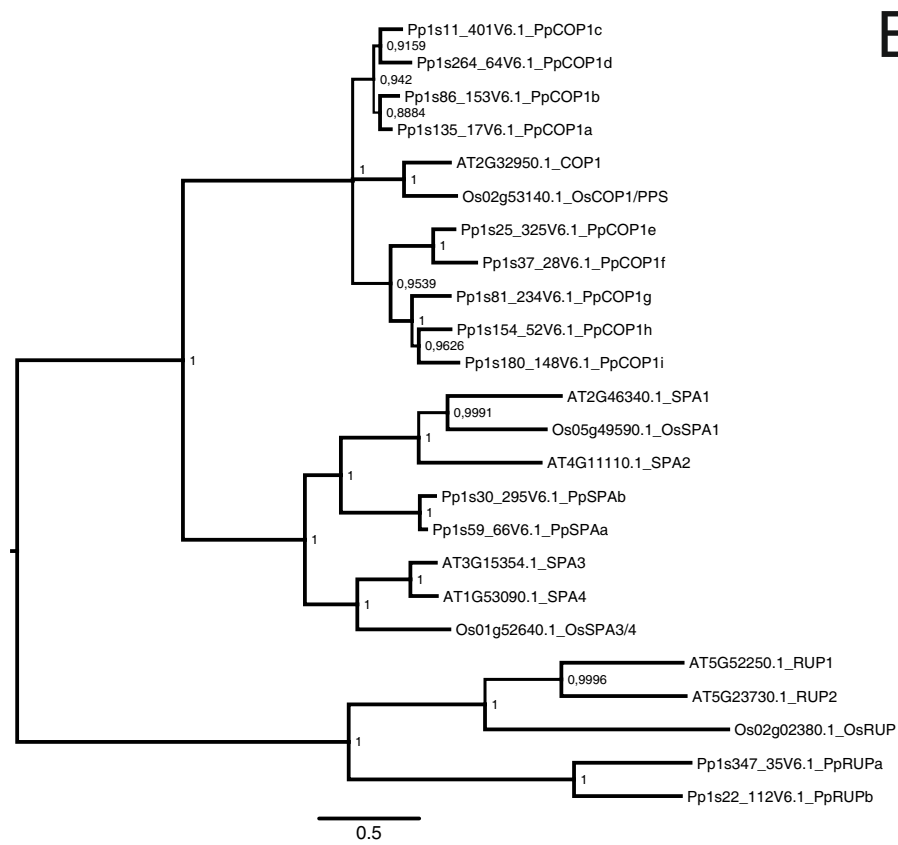

B

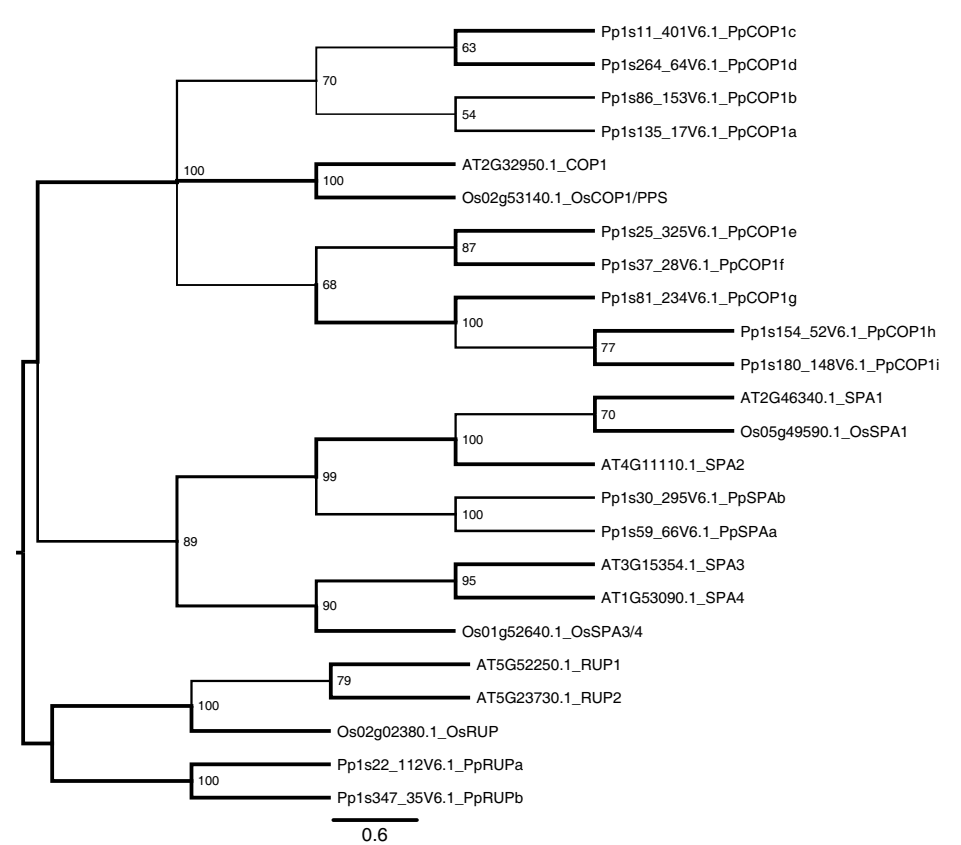

C

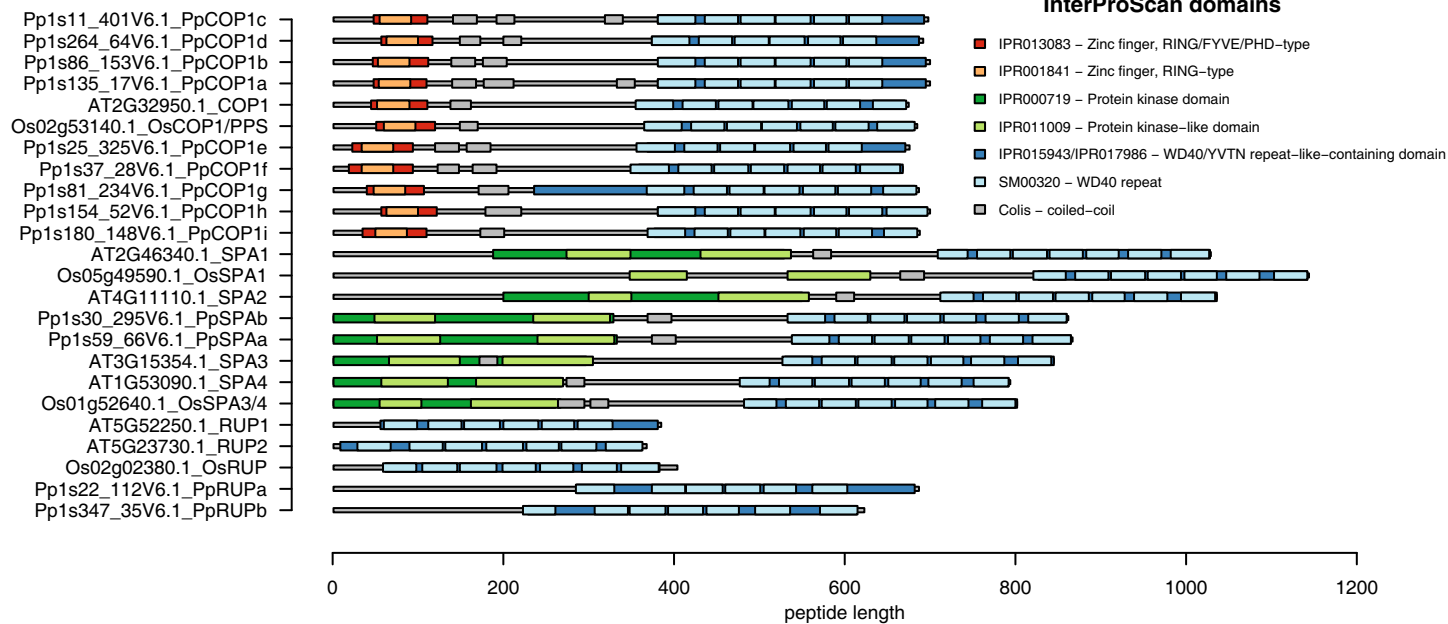

Supplement: 1471-2229-14-178-S1.pdf [file 1471-2229-14-178-S1.pdf]
